# Supplementary material for: Hypothalamic representation of the imminence of predator threat detected by the vomeronasal organ in mice
Source: eLife. 2024 Oct 16;12:RP92982. doi: 10.7554/eLife.92982 (PMC11483128; doi:10.7554/eLife.92982)
Supplement: Figure 1—source data 1. [file elife-92982-fig1-data1.xlsx]

## Sheet: Figure 1D
Latency to the first contact
Ctrl	Fresh	Old
31.497	41.647	14.006
54.547	87.283	31.25
16.247	61.49	8.447
29.654	49.999	17.244
1.14	17.498	10.767
127.47	36.678	21.504
45.09	33.65	70.133
207.87	539.372	5.727
16.62	63.257	16.37
8	87.041	51.245
5.77	378.971	14.168
268.07	49.738	6.501
21.278	24.942	3.567
40.25	165.4	8.254
3.997	117.777	10.247
1	65
31.382	285.725
25.619	96.372

## Sheet: Figure 1E
Freezing duration
Ctrl	Fresh	Old
0	15.2	0
0	56.7	16.4
0	70.6	14.2
0	0.4	38.2
1.3	66.3	27.6
0	71.6	0
0	92.9	8.8
0	68.3	34.95
0	65	0
0	82	11.3
0	23.5	7.3
0	20.5	82
0	75.3	10.6
0	39.3	15.8
0	22.3	0
0	59.4
0	96.8
0	83.6

## Sheet: Figure 1F
Stretch sniff duration
Ctrl	Fresh	Old
0.7	0.6	0.6
1	1.3	0
0.7	0.2	0.5
4.6	3.2	0.9
0.7	1	0.04
1.9	0.7	0.01
0.5	0.9	0.02
1.3	3.4	0.04
0.6	0.7	2.8
0	0.3	0.8
2	0.4	0
0.8	1.2	0.2
2.3	0.2	0.5
2.3	0.8	0.9
0.9	0.6	0.8
0	2
0.7	0.8
0.4	3

## Sheet: Figure 1G
Direct investigation duration
Ctrl	Fresh	Old
65.8	3.3	11.5
54.9	3.5	2
72.2	3.3	6.6
38.3	27.3	1.2
2.3	2.6	2.2
6.6	2.5	7.5
52.5	0.2	20.8
13.3	0.9	3.4
69.2	1.2	56.3
39.2	0.4	12.2
37.4	0.4	7.4
6.3	2.8	2.3
64.8	1.3	7.1
37.3	0.3	3.5
58.4	24.5	10.9
12.5	0.9
55	0.8
71.7	1.8

## Sheet: Figure 1H
Plasma ACTH concentration (pg/mL)
Ctrl	Fresh	Old
2.49775	115.893	13.0776
41.0355	102.862	57.5472
38.5952	78.0275	242.383
90.7182	115.782	149.99
0	55.0084	24.0447
51.016	140.401	23.7974
37.2466	103.769	123.169
69.9178	189.861	79.5838
76.7626		92.5014
83.617		117.197

## Sheet: Figure 1I
Saliva volume (uL)
Fresh	Old
31.3333	28.6667
30	28
30	28.75
36.25	25
22.5	20.5

## Sheet: Figure 1J
Saliva protein concentration (ug/uL)
Fresh	Old
1.83447	1.747
1.06812	1.20858
0.86212	1.0671
1.82008	1.17356
1.40904	2.82626
1.71814	1.31304

## Sheet: Figure 1K
Freezing duration
70% saliva	50% saliva	30% saliva	Fresh	Old
87.4	1.7	7	15.2	0
76.9	29	0	56.7	16.4
69.7	6.5	45.1	70.6	14.2
34.4	0	0.8	0.4	38.2
	53.1	36.2	66.3	27.6
	22.7	0	71.6	0
	6.3	66.5	92.9	8.8
	0	40.5	68.3	34.95
	33.6		65	0
			82	11.3
			23.5	7.3
			20.5	82
			75.3	10.6
			39.3	15.8
			22.3	0
			59.4
			96.8
			83.6

## Sheet: Figure 1L
Direct investigation duration
70% saliva	50% saliva	30% saliva	Fresh	Old
0.4	32.9	7.9	3.3	11.5
0.4	10.8	37.9	3.5	2
0.3	4.4	2.8	3.3	6.6
3.8	25.2	29.6	27.3	1.2
	3.6	7.2	2.6	2.2
	35	21.5	2.5	7.5
	7.5	1.2	0.2	20.8
	16.5	2.2	0.9	3.4
	1.3		1.2	56.3
			0.4	12.2
			0.4	7.4
			2.8	2.3
			1.3	7.1
			0.3	3.5
			24.5	10.9
			0.9
			0.8
			1.8
