# Supplementary material for: Hypothalamic representation of the imminence of predator threat detected by the vomeronasal organ in mice
Source: eLife. 2024 Oct 16;12:RP92982. doi: 10.7554/eLife.92982 (PMC11483128; doi:10.7554/eLife.92982)
Supplement: Figure 2—source data 1. [file elife-92982-fig2-data1.xlsx]

## Sheet: Figure 2A
Freezing duration
Ctrl	Saliva
3.4	25.6
0	0
0	0
2.9	0
1.7	1.3
14.3	2.6
8.7	0
0.4	0
0	0
0	4.5
3	0
0

## Sheet: Figure 2B
Direct investigation duration
Ctrl	Saliva
1.1	1.3
0.9	63.8
73.4	45
37.9	7.2
0	24.4
4.4	38.7
7.4	70.4
33.8	37.3
22.5	48.1
42.4	44.6
3.9	34.7
40.3

## Sheet: Figure 2C
Freezing duration
Trpc2 WT		Trpc2 KO
Ctrl	Saliva	Ctrl	Saliva
0.4	20.7	0	0
0	51.6	2.1	0
4.2	2.5	0	0
0	0	0	0.5
0	48.8	3.1	0
32.6	20.7	5.9	0
3.3	1	0	0.2
3.6	7	4.3	0
0	21.2	8.1	0
1	80.5

## Sheet: Figure 2D
Direct investigation duration
Trpc2 WT		Trpc2 KO
Ctrl	Saliva	Ctrl	Saliva
7.2	16	39.9	60.9
69.4	2	62.6	30.5
16.2	8.6	47.3	50.3
66.7	18.8	42.2	18.4
14.4	0.3	4	47.7
49.5	0.7	29.8	63.8
57.2	2.6	41.3	20
53.1	1.9	54.9	48.8
66.9	3	34.3	33.4
48.2	1.3

## Sheet: Figure 2F
pS6IR/ 1000 cells (Apical)
Ctrl	Fresh	Old
0	0	0
1.06308	0	0.483442
0	0	0.755985
0.202778	0.222218	0.752106
0.360685	0	0
0.193162	0.0639264	0.0777363
0.754148	0	0
0.34227	0	0

## Sheet: Figure 2G
pS6IR/ 1000 cells (Basal)
Ctrl	Fresh	Old
0.0801732	3.32226	0.503208
0.236239	7.73507	0.0943485
0	8.48383	0.449304
0.101389	8.87485	4.28664
0	6.3599	3.34211
0.772648	7.54042	7.41546
0.251383	9.02708	4.98325
0.22818	18.1291	0.480423

## Sheet: Figure 2H
Correlation analysis
Control		Fresh		Old
pS6-IR	Freezing %	pS6-IR	Freezing %	pS6-IR	Freezing %
0.0801732	18.7	3.32226	63.2	0.503208	14
1.29931	0.5	8.21852	67.6	0.0943485	0
0	0	9.23982	93.6	0.449304	27.1
0.304167	0	9.62696	53.2	4.50886	38.8
0.360685	17.1	6.3599	72.8	3.34211	0
0.96581	0	7.61816	29.8	7.47938	14
1.00553	0	9.02708	19.7	4.98325	1.3
0.570451	0	18.1291	25.7	0.480423	10.6
