# Supplementary material for: Hypothalamic representation of the imminence of predator threat detected by the vomeronasal organ in mice
Source: eLife. 2024 Oct 16;12:RP92982. doi: 10.7554/eLife.92982 (PMC11483128; doi:10.7554/eLife.92982)
Supplement: Figure 4—source data 1. [file elife-92982-fig4-data1.xlsx]

## Sheet: Figure 4C
cFosIR/ 1000 cells
Ctrl	Fresh	Old
1.60772	0	2.18998
9.30645	10.0115	3.04414
3.93391	1.63265	0.83426
10.1134	1.67184	0.297619
5.23128	4.17163	2.63992
5.09482	3.57143	0
1.34998	2.45927	0.314762
8.21713	3.99467	1.90269
1.17336	5.72776	12.971
1.98741	4.40787	7.00571

## Sheet: Figure 4D
cFosIR/ 1000 cells
Ctrl	Fresh	Old
0	1.04877	1.72414
1.72018	6.12245	2.46305
0	6.39819	5.67967
2.77888	3.16678	10.6018
3.02847	4.87013	7.07744
1.59109	6.88976	7.00219
2.88323	1.0917	6.90276
1.97889	12.1212	1.36762
3.19574	10.4046	10.3834
0.394477	3.83509	9.79154

## Sheet: Figure 4E
cFosIR/ 1000 cells
Ctrl	Fresh	Old
1.61499	2.01396	3.39335
3.33102	5.41216	5.72388
2.7604	3.25529	3.07662
4.89237	1.59206	0.606796
5.59386	0	0.526662
6.66667	6.13999	7.30953
0.910249	3.31466	3.10121
5.79132	3.99822	0.904977
1.87774	0.904568	0.322373
2.06849	1.97005	0.336078

## Sheet: Figure 4F
cFosIR/ 1000 cells
Ctrl	Fresh	Old
1.58061	10.4947	3.98274
3.33102	2.07708	6.49623
2.23714	8.08793	19.2268
1.73831	11.5319	11.7799
2.23007	5.47271	7.22624
4.56534	15.3934	29.2356
2.18394	15.4639	13.3956
2.75541	10.8717	2.50278
1.26035	3.64697	2.97232
1.03333	9.14897	5.69844

## Sheet: Figure 4G
cFosIR/ 1000 cells
Ctrl	Fresh	Old
15.8201	28.0033	19.305
13.7779	22.9853	23.3509
20.6825	41.1423	25.066
19.4257	11.3636	24.0649
28.4561	12.7437	9.34183
42.8876		3.03306
16.5138
10.469
7.73629
25.7099

## Sheet: Figure 4H
cFosIR/ 1000 cells
Ctrl	Fresh	Old
6.06796	46.137	38.8889
12.8298	39.6751	34.1472
9.30851	20.8143	27.7627
30.1442	24.7813	29.3148
5.52563	15.025	45.5134
32.8867	19.9912	7.53224
14.1612		3.07569
18.6845
3.43237

## Sheet: Figure 4I
cFosIR/ 1000 cells
Ctrl	Fresh	Old
1.18	5.27	2.92
0.76	3.83	4.27
0.8	2.65	3.47
0.47	4.47	5.34
1.61	1.2	3.8
0.2	4.47	1.35
		1.07

## Sheet: Figure 4J
cFosIR/ 1000 cells
Ctrl	Fresh	Old
8.85811	28.5309	21.6173
4.59318	15.1405	27.8192
1.67598	23.7803	20.4082
1.89663	24.0583	6.59859
21.528	0.678043	23.2695
	8.32224	2.09153
		23.2693
		22.4129
