# Supplementary material for: Hypothalamic representation of the imminence of predator threat detected by the vomeronasal organ in mice
Source: eLife. 2024 Oct 16;12:RP92982. doi: 10.7554/eLife.92982 (PMC11483128; doi:10.7554/eLife.92982)
Supplement: Figure 5—source data 1. [file elife-92982-fig5-data1.xlsx]

## Sheet: Figure 5A
Correlation analysis
Fresh		Old
cFos-IR	Freezing %	cFos-IR	Freezing %
1.04877	67.6	1.72414	15.6
6.12245	93.6	2.46305	0
6.39819	53.2	5.67967	38.8
3.16678	42.9	10.6018	0
6.88976	63.2	7.07744	1.3
1.0917	0.9	7.00219	13.8
12.1212	3	6.90276	7.1
10.4046	29.8	1.36762	81.1
3.83509	72.8	10.3834	10.6
		8.5197	15.6

## Sheet: Figure 5B
Correlation analysis
Fresh		Old
cFos-IR	Freezing %	cFos-IR	Freezing %
10.4947	67.6	3.98274	15.6
2.07708	93.6	6.49623	0
8.08793	53.2	19.2268	38.8
11.5319	42.9	11.7799	0
15.3934	63.2	7.22624	1.3
15.4639	0.9	2.50278	13.8
10.8717	3	2.97232	7.1
3.64697	29.8	5.69844	81.1
9.14897	72.8	29.2356	10.6
		13.3956	15.6

## Sheet: Figure 5C
Correlation analysis
Fresh		Old
cFos-IR	Freezing %	cFos-IR	Freezing %
28.0033	93.6	19.305	5.9
22.9853	53.2	23.3509	15.6
41.1423	67.6	25.066	13.8
11.3636	74.5	24.0649	7.1
12.7437	72.8	9.34183	10.6
		3.03306	15.6

## Sheet: Figure 5D
Correlation analysis
Fresh		Old
cFos-IR	Freezing %	cFos-IR	Freezing %
46.137	67.6	38.8889	14
39.6751	93.6	34.1472	5.9
20.8143	53.2	27.7627	15.6
24.7813	74.5	29.3148	13.8
15.025	29.8	45.5134	7.1
19.9912	72.8	7.53224	10.6
		3.07569	15.6

## Sheet: Figure 5E
Correlation analysis
Fresh		Old
cFos-IR	Freezing %	cFos-IR	Freezing %
5.27	67.6	2.92	14
3.83	93.6	4.27	5.9
2.65	53.2	3.47	15.6
4.47	74.5	5.34	13.8
1.2	29.8	3.8	7.1
4.47	72.8	1.35	10.6
		1.07	15.6

## Sheet: Figure 5F
Correlation analysis
Fresh		Old
cFos-IR	Freezing %	cFos-IR	Freezing %
28.5309	67.6	21.6173	14
15.1405	93.6	27.8192	5.9
23.7803	53.2	20.4082	15.6
24.0583	74.5	6.59859	13.8
0.678043	29.8	23.2695	7.1
8.32224	72.8	2.09153	10.6
		23.2693	15.6
		22.4129	12.9
