# Supplementary material for: Hypothalamic representation of the imminence of predator threat detected by the vomeronasal organ in mice
Source: eLife. 2024 Oct 16;12:RP92982. doi: 10.7554/eLife.92982 (PMC11483128; doi:10.7554/eLife.92982)
Supplement: Figure 6—source data 1. [file elife-92982-fig6-data1.xlsx]

## Sheet: Section 1
cFos-IR
bin	Ctrl								Fresh						Old
1	0	0	0	0	0	0	2	5	4	3	1	2	5	5	7	5	1	1	0	0	2
2	0	5	1	2	1	0	7	5	8	4	8	3	8	17	17	14	1	10	0	3	1
3	0	7	1	2	2	0	4	4	6	4	7	5	20	18	19	26	2	17	3	10	6
4	1	8	1	1	0	1	2	0	10	4	9	7	31	31	29	8	1	9	2	4	12
5	0	2	0	2	2	1	2	0	15	4	11	9	36	19	19	3	1	0	0	1	16
6	2	4	0	0	1	1	1	0	16	0	9	13	16	12	14	1	0	1	2	2	5
7	0	0	0	1	0	0	1	1	10	4	2	3	3	6	10	0	0	0	0	0	2
8	0	0	0	0	0	0	0	0	4	0	3	8	0	3	10	2	0	0	0	1	0
9	1	1	0	1	0	0	0	1	1	0	1	0	0	3	13	1	1	0	3	1	0
10	0	0	1	0	0	0	1	0	0	0	0	0	0	0	3	0	1	1	0	1	0

## Sheet: Section 2
cFos-IR
bin	Ctrl								Fresh												Old
1	1	0	0	1	5	14	0	0	2	4	6	6	3	5	3	1	2	1	2	1	0	0	7	6	6	10	4	6	0
2	4	5	1	1	5	13	0	0	8	9	14	12	5	6	3	8	2	2	5	8	0	3	8	8	18	24	8	13	0
3	1	4	1	0	10	10	0	2	14	15	10	2	12	13	23	37	3	14	5	9	18	11	9	9	16	19	8	21	0
4	2	3	3	0	8	2	0	1	14	8	5	4	7	10	14	12	6	2	6	11	17	4	3	4	16	8	6	11	2
5	6	4	0	1	0	0	0	0	11	8	8	7	6	4	7	1	1	1	11	7	1	0	2	1	4	2	0	3	1
6	4	3	1	1	2	3	0	0	10	2	3	4	1	4	2	3	0	0	5	1	0	2	1	1	1	4	1	1	0
7	0	1	0	1	0	0	0	0	3	2	1	1	2	5	3	2	1	0	2	1	1	0	0	0	3	2	0	4	1
8	0	0	0	0	1	0	0	0	2	3	2	9	0	2	2	1	0	3	3	0	0	0	1	0	6	0	6	1	0
9	0	1	0	1	0	1	0	0	0	2	1	9	0	2	1	1	1	1	2	1	0	0	0	0	3	0	8	0	0
10	0	0	0	0	0	0	0	0	0	2	2	5	0	1	1	1	1	0	0	0	0	1	1	1	3	0	5	0	0

## Sheet: Section 3
cFos-IR
bin	Ctrl										Fresh												Old
1	0	0	0	0	0	0	2	5	0	0	1	4	3	3	2	2	5	8	1	0	2	4	7	4	0	1	5	1	2	6	3	6	2	0	2
2	1	3	0	0	2	1	9	9	0	0	9	8	7	16	6	14	19	21	5	10	6	7	19	20	2	5	3	3	3	12	10	5	8	1	0
3	4	4	0	0	1	0	11	6	0	0	17	25	22	14	10	16	25	38	7	12	14	28	24	21	7	6	9	8	4	4	3	3	9	5	0
4	6	7	0	3	2	0	7	1	0	0	17	12	16	8	15	10	27	22	0	9	29	20	8	12	12	1	17	13	4	0	5	0	8	3	0
5	9	2	0	3	0	1	3	1	0	0	9	6	5	10	3	1	10	5	1	0	3	8	0	4	13	0	12	2	1	0	0	3	4	0	0
6	4	1	0	0	0	1	0	0	0	0	2	1	2	0	0	1	5	1	0	1	0	2	1	2	3	1	2	3	0	0	3	2	2	0	0
7	0	1	0	0	0	1	0	0	1	0	0	6	5	2	1	0	4	1	1	0	0	4	1	0	0	2	3	2	1	1	3	1	10	0	0
8	2	0	0	0	1	1	1	0	0	0	3	5	1	2	0	0	2	2	2	1	1	3	1	1	0	3	3	0	1	0	1	3	14	0	0
9	0	4	0	0	1	0	1	0	0	0	4	4	2	0	0	0	6	4	0	0	2	1	0	0	0	0	1	0	5	0	0	4	2	0	0
10	0	0	0	0	1	0	0	0	0	0	0	1	1	0	0	0	1	0	0	1	0	0	0	0	1	0	0	0	2	0	0	4	1	0	0

## Sheet: Section 4
cFos-IR
bin	Ctrl										Fresh										Old
1	0	1	0	0	0	0	1	0	0	0	5	12	1	2	1	3	0	2	6	7	2	1	12	13	0	1	3	1	0	0	0
2	2	0	2	1	1	0	0	2	0	0	23	34	2	5	5	6	3	3	9	17	11	6	13	16	1	2	2	3	5	0	0
3	2	1	1	0	2	1	3	6	0	3	23	31	1	5	14	9	2	3	19	19	20	13	26	34	1	4	4	3	1	2	0
4	0	0	0	0	2	1	1	1	0	3	28	16	5	1	15	2	1	1	8	9	11	9	10	5	1	3	5	2	0	0	0
5	1	0	2	0	0	0	1	1	2	1	8	5	11	1	4	0	0	0	2	4	5	4	4	0	7	3	5	4	0	0	0
6	0	1	0	0	0	0	0	0	0	0	3	3	4	0	0	0	1	0	2	1	0	6	0	0	2	1	3	0	0	0	0
7	0	0	0	0	0	0	3	0	0	0	0	4	0	2	1	0	0	0	0	1	0	0	1	0	2	1	2	0	0	0	0
8	0	0	0	0	1	1	0	0	1	0	1	2	0	0	0	0	0	0	2	3	2	3	2	0	1	2	0	0	0	0	0
9	0	0	0	0	1	1	2	0	1	0	4	5	2	0	0	1	0	0	0	3	1	1	1	1	0	0	0	0	0	0	0
10	0	0	0	0	0	0	1	0	0	0	1	1	0	0	0	0	0	0	0	1	0	1	1	0	0	0	0	1	0	1	0

## Sheet: Section 5
cFos-IR
bin	Ctrl								Fresh										Old
1	0	1	0	1	0	0	0	0	4	11	8	5	3	1	0	2	1	1	3	1	2	3	2	8	4	2	1	0	0
2	0	5	2	0	0	0	0	0	9	12	16	2	2	3	0	0	4	8	2	0	8	9	3	4	9	2	1	1	0
3	0	3	1	0	0	0	0	0	14	16	16	7	0	1	0	1	6	18	0	2	13	11	11	12	9	4	2	1	0
4	0	2	0	0	0	0	0	0	9	8	6	13	0	0	0	0	3	2	0	0	12	8	5	8	11	5	4	1	0
5	0	3	0	1	0	0	0	0	3	2	2	3	0	0	0	0	5	1	0	0	3	0	1	5	7	6	3	0	0
6	0	1	0	0	0	0	0	0	1	1	3	1	0	0	0	0	2	1	0	0	1	0	0	6	9	7	0	0	0
7	0	0	0	0	1	0	0	0	2	1	1	0	0	0	1	0	1	1	0	2	0	0	0	5	2	0	0	0	0
8	0	1	1	1	0	0	0	0	0	0	1	1	0	4	0	0	1	0	0	0	1	0	0	3	1	1	0	1	0
9	1	0	1	0	0	0	0	0	1	0	1	1	0	1	0	0	1	0	0	0	3	0	0	3	0	1	0	0	0
10	0	0	0	0	0	0	1	0	0	0	2	0	0	1	0	0	0	2	0	0	0	0	0	0	1	0	0	0	0
