# Supplementary material for: Hypothalamic representation of the imminence of predator threat detected by the vomeronasal organ in mice
Source: eLife. 2024 Oct 16;12:RP92982. doi: 10.7554/eLife.92982 (PMC11483128; doi:10.7554/eLife.92982)
Supplement: Figure 7—source data 1. [file elife-92982-fig7-data1.xlsx]

## Sheet: Figure 7D
% of double positive in tdTomato
Fresh to Fresh	Old to Fresh
7	5
36	45
32	13
65	0
74	0

## Sheet: Figure 7E
% of double positive in cFos-IR
Fresh to Fresh	Old to Fresh
6	12
22	23
23	17
47	0
32	0
