# Supplementary material for: Hypothalamic representation of the imminence of predator threat detected by the vomeronasal organ in mice
Source: eLife. 2024 Oct 16;12:RP92982. doi: 10.7554/eLife.92982 (PMC11483128; doi:10.7554/eLife.92982)
Supplement: Supplementary file 1. [file elife-92982-supp1.xlsx]

## Sheet: Figure 1K, L
Tukey's multiple comparisons test
Freezing (Figure 1K)
	Adjusted P Value
Fresh vs. Old	0.0005
Fresh vs. 70% Fresh	0.9265
Fresh vs. 50% Fresh	0.0027
Fresh vs. 30% Fresh	0.0312
Old vs. 70% Fresh	0.0071
Old vs. 50% Fresh	>0.9999
Old vs. 30% Fresh	0.9708
70% CS vs. 50% Fresh	0.0116
70% CS vs. 30% Fresh	0.0506
50% CS vs. 30% Fresh	0.9696
Interaction (Figure 1L)
	Adjusted P Value
Fresh vs. Old	0.5703
Fresh vs. 70% Fresh	0.9879
Fresh vs. 50% Fresh	0.1525
Fresh vs. 30% Fresh	0.3101
Old vs. 70% Fresh	0.6238
Old vs. 50% Fresh	0.8461
Old vs. 30% Fresh	0.9578
70% CS vs. 50% Fresh	0.265
70% CS vs. 30% Fresh	0.3912
50% CS vs. 30% Fresh	0.9989

## Sheet: Figure 6B-Two-way ANOVA
Two-way ANOVA
Section	Variation	F (DFn, DFd)	P value
1	bin x swab type	F (18, 162) = 3.930	<0.0001
	bin	F (1.795, 32.30) = 13.63	<0.0001
	swab type	F (2, 18) = 5.753	0.0117
2	bin x swab type	F (18, 234) = 2.538	0.0008
	bin	F (2.961, 76.99) = 20.84	<0.0001
	swab type	F (2, 26) = 7.364	0.0029
3	bin x swab type	F (18, 288) = 8.220	<0.0001
	bin	F (2.684, 85.89) = 32.86	<0.0001
	swab type	F (2, 32) = 14.75	<0.0001
4	bin x swab type	F (18, 252) = 3.347	<0.0001
	bin	F (1.595, 44.67) = 16.10	<0.0001
	swab type	F (2, 28) = 5.491	0.0097
5	bin x swab type	F (18, 234) = 2.937	<0.0001
	bin	F (1.964, 51.06) = 12.23	<0.0001
	swab type	F (2, 26) = 4.325	0.0239

## Sheet: Figure 6B-Tukey's multiple com
p value (Tukey's multiple comparisons test)
Bin		Section 1	Section 2	Section 3	Section 4	Section5
1	Ctrl vs. Fresh	0.052	0.9767	0.0324	0.0269	0.0367
	Ctrl vs. Old	0.4929	0.7034	0.0316	0.1803	0.0281
	Fresh vs. Old	0.6752	0.584	0.9954	0.8789	0.6207
2	Ctrl vs. Fresh	0.1021	0.2383	0.0013	0.0396	0.0598
	Ctrl vs. Old	0.3855	0.2196	0.115	0.0527	0.1092
	Fresh vs. Old	0.9042	0.7204	0.2985	0.359	0.5757
3	Ctrl vs. Fresh	0.1046	0.0187	<0.0001	0.0225	0.0286
	Ctrl vs. Old	0.0764	0.0144	0.0726	0.1169	0.0172
	Fresh vs. Old	0.9102	0.9756	0.0064	0.8327	0.7651
4	Ctrl vs. Fresh	0.0916	0.0021	0.0005	0.0504	0.0672
	Ctrl vs. Old	0.179	0.0523	0.129	0.0577	0.0146
	Fresh vs. Old	0.6076	0.9851	0.0141	0.3502	0.9129
5	Ctrl vs. Fresh	0.0539	0.0067	0.0715	0.1121	0.2498
	Ctrl vs. Old	0.363	0.9797	0.7531	0.0514	0.1533
	Fresh vs. Old	0.2223	0.0035	0.4166	0.9068	0.7722
6	Ctrl vs. Fresh	0.0214	0.4539	0.5051	0.0568	0.0969
	Ctrl vs. Old	0.4455	0.7104	0.2474	0.2551	0.1941
	Fresh vs. Old	0.0849	0.1688	0.9157	0.911	0.5344
7	Ctrl vs. Fresh	0.035	0.003	0.0525	0.6027	0.0848
	Ctrl vs. Old	0.6353	0.1991	0.1411	0.805	0.3781
	Fresh vs. Old	0.2889	0.5182	0.9863	0.8601	0.9728
8	Ctrl vs. Fresh	0.119	0.0284	0.0268	0.4311	0.7418
	Ctrl vs. Old	0.427	0.2746	0.3347	0.269	0.7179
	Fresh vs. Old	0.8121	0.8054	0.9744	0.9737	0.9905
9	Ctrl vs. Fresh	0.799	0.1698	0.1948	0.3013	0.5455
	Ctrl vs. Old	0.467	0.6465	0.8618	0.8703	0.6078
	Fresh vs. Old	0.5811	0.8893	0.4167	0.2078	0.9382
10	Ctrl vs. Fresh	0.3358	0.0593	0.39	0.5308	0.439
	Ctrl vs. Old	0.3892	0.1434	0.3244	0.3397	0.9736
	Fresh vs. Old	0.1655	0.979	0.7183	0.9532	0.3543
