# Supplementary material for: Hypothalamic representation of the imminence of predator threat detected by the vomeronasal organ in mice
Source: eLife. 2024 Oct 16;12:RP92982. doi: 10.7554/eLife.92982 (PMC11483128; doi:10.7554/eLife.92982)
Supplement: Supplementary file 2. [file elife-92982-supp2.xlsx]

## Sheet: Sheet1
Group	Gene	Sequence
A1	Vmn2r13	AAAAATACCCAGTAAACATTTCTGAGACTAGACTGGGGTGGAATTCTTTTAATTGCTCCATCTCTAAGAACAGCAATAAAAAGGATCATTTTACATTCAACAACACATTAGAATGGACAGCAAGGAACAATTTTGACATGGTCCTGAGTGAGGAAGGTTACAATCTGTATAATGCTGTATATGCTGTGGCCCACACCTACCATGAACTCATTCTTCAACAAGTAGAATCTCAGCAAATGGCAGTACCCAAAGGAATATTCACTGACTGTCAGCAGGTGGCTTCCTTGCTGAAGACCAGAGTATTTACTAACCCTGTTGGAGAACTGGTGAACATGAAGCATAGGGAAAATCAGTGTGCAGATTATGACATTTTCATCATTTGGAATTTTCCAAAAGGCC…
A2	Vmn2r118	AATCTTTCTAAGGACACACATTATTTTTCTTCTGAAAGACTTGGGTGGATGTACTTTAACTGTTCAATATTAAAATCTAACTGTAAAACACCAAACCAGTGCACATCCAGCAACTTATTGGAATGGTTACCACGGCACAGTTTTGACATGGCCATGAATGATGAGAGTTACAATATATACAATGCTATATATGCTGTGGCTCATGCTCTCCATGAAATGGTCCTTCAAAAAATAGATTTTCAGCAACTGGAAAATGTGACCCAACTAATGCAGGAGTGCGTGCAGATCCATGCATTCTTGGAAAACATGCAGTTTTTGAATCCTATTGGAGATGTAGTGATCATTAATCAGCAAGCAAAAACAGATGCAGAGTATGAGATCTATATGATTTGGAATTTT…
A3	Vmn2r117	AACTCTGTCAAATGCCCAGATGAATATCTGGTAAAGCTGGAATGGATGCACTTTAACTGTGAGGTCTCAGCCTCTAAATGTAAGACACTGAAGAACTGCTCATCCAATCACTCATTGGAATGGTTAATGGTACATACTTTTGATATGGCTTTTATTGAAGGGAGTTATGACATATACAATGCTGTGTATGCTTTTGCCCATGCACTCCATCAGATAGCTTTTCAAAAGCTTGATAATCTGCCCAAGGACAATGGGAAAGAACACAATTATAGCTGCAAGAAGCTGTATTCCTTTCTGAGAAAGACCCAGTTCACTAATCCTGTTGGGGACAGAGTAAATATGAACCGAAGAAACAAACTGCAGGAAGAATATGACATTTTCTACATTTGGAATTTCCCA…
A4	Vmn2r42	TTCCATCTCAGAAACACAGATTTATGTCTAGTAATGCCAGAGTGGAAATATATTAACTCTGAAGACTCAGCATCTAATTGTAAAATACTTAAGAACAGTTCATCTGATGCCTCATTTGATTGGCTAATGGAAGAGAAGCTTGACATGGCCTTTAGTGAGAATAGTCATAACATATATAATGCTGTGCATGCCATAGCCCATGCCCTCCATGAGATGAATCTGCAACAGGCTGATAATCAGGCAATAGATAATGGAAAAGGAGCCAGTTCTCACTGCTTGAAGGTAAACTCCTTTCTAAGAAGGACCTACTTCACTAATCCTCTTGGGGACAAAGTGTTTATGAAGCAAAGAGTAATAATGCAGGATGAATATGACATTGTTCACTTTGCGAATCTCTCA…
A5-1	Vmn2r69	ACAGTAGTGAATTTTCCTTTGCCAAACTATGGTGGACATATTTTAGATGTTCATTGCCACCATCGAATTGTAAGAAGCTGAAGAATTGTCCAACCAAAACTATATTTACATGGTTATTCAGGACACCATTTGGAATGGCCATGAGTGATACATGCTATAACTCATACAATGCTATATATGCTGTGGCCCACTCACTTCATGAGATGCTTATGCAAGAAGTAGACACATGGTCAAATAATGCTGGGAAGGAACTGGAATTTGACTCTTGGAAGATGTTCTCTATTCTGAAGACCTTAAAATTTGTAAATCCTGCTGGAGACCTAGTCAACATGAACCAGAATTTGAAGCAGGCTACACAGTATAACATTTTCTATGTCATGGATTTTCAAAAAGATTATG…
A5-2	Vmn2r65	ACCCTTCCAACTACAGTAAGGATACTTCCCTTGCTAGGTTGTGGTGGCTGTATTTCAACTGTTCATTGCCATCTCATTGTAAGACACTGAAAAATTGTTCAACCAAAATCCTACTAGAATGGTTATCCAGGCACCAGTTTGAAGTGTCAATGAGCGAGCCAAGTTACAACCTATACAATGCTGTCTATGCTGTAGCCTATGCACTCCATGAAATGCTTATTCAACATACAGAACATTGGCAGAAGGATATTGGAAAAGAACTGGAATTTTACTCCTGGAAGGTGGCCCCTTTCCTGGAGAACAACAAATTTATAATTCCTTCTGAATATCAATACAGAAGAGGGAAACTGGATACAGAATATGACATTCTCTATGCTATGGATCTTCTACCAGCTCTTG…
A5-3	Vmn2r76	CCTTTAAACTACAGTAACACTATTTCTCTTGCTAAATTATGGTGGTTGAATTTTAATTGTTTTTTGTCATCATCTAATTGTAAGAGTCTCAAGACATGTTCAAGAAAAATGTTGCTGAAATGGTTATCCAGAAACCACTTTGAAATGTCCATGAGTGACACAAGTTATAACCTATACAATGCTGTGTATGCTGTAGCCCATTCACTCAATGAGTTACTTCTGCAGCAAGCAAATACATTGTCAAATAATGTTGGGAAAGGACTGGAGTTTGATTCTTTGCAGGTGCTCTCTTCCCTGAAGAACATCCATTTTGTAAATCCTGCTGGAGACCTAGTGAACTTGAATCAGAAAGAAAACATGAATATAAATTATGATATTTTCTACACTGGAAATTTTTTA…
A6	Vmn2r120	ATACAGACTGTAAACCCATCCAAATATCCAGATGATATCTTTCTTTCACATATATGGAAAATGTATTTGAATTGTCCATTTTCACGGGTTTACTGTAAAACACTGAAAACTTGTTCATCCAATGGATCCTTGGCATTGTTACCTTGGCACCGATTTGACATGGACATGAGTGAAGAGAGTTATCACATATATAACGCAGTGTATGCAGTTGCCCACAGCCTCCATGAAATGCTCCAAGAACATGCAGATGTACAACCAGTGAAAAGCAGGAAAAGACTGGTTTTTTCCCCTTGTAGGCTACACCCTTTCCTGAAGAACATCCAGTTTAATAATCCTAGTGGAGACAAAGTAGATCTGAGCCATACAGGAAAACTGGAAACAAAGTATGACATTTTTAAC…
A8-1	Vmn2r98	AATCCCAATAAATACCCAGAAGACGTTTATCTTCCTAAGCTGTGGTATTTGTTCTTCAAGTGCTCATTTTCTGACACTAATTGTCATGTGTTGGGAAACTGTCAAACCAATGCTTCTTTGGAAGTATTCCCTAGTCACATATTTGATGTGGCCATGAATGCCGAGAGCACAAGTATTTACAATGGTGTGTATGCTGTGGCTCACAGCCTCCATGAGATGAGACTTCAGCAACTTCAAATGCAACCATATGAAAATCCCCATGGGATGGTGTTCTTTCCATGGCAGCTTAACTCGTTCCTGAAGGATATTGAAGTGAAAGACAAAAGGAGTTTAGATTGGAGACAGACAATAGATACAGAGTATGACATTCTTAACATTTGGAATATGCCAAAGGGTCTT…
A8-2	Vmn2r105	GTTAATCCCTACAAATATCCAGAAGATATTTATCTTCCTAAGTTGTGGCATTTGTTCTTCAAGTGTTCATTTTCTGATAATGGTTGTCAACTTTTGAACAACTGTCAGTTCAATGCTTCTTTGGATGCATTGCCTCGTCACATATTTGATGAGTCCATGAGTGATGAGAGTACCAGCATATACAATGCTGTGTATGCTGTGGCTCACAGTCTCCATGAGTTGACACTTCAGCAAGTACAAATGGAACCATATGAAAATGGGGAAGAAACTTTGTTTTTTCCATGGCAGCTCAACTCTTTCCTGAAGGACATTGAAGTGGGAGGCCAAATGAGATTAGATTGGAGACAGGAAGTAAATGTAAAATATGACATTCTTAACATTTGGAATTTACCAAAGGGT…
A8-3	Vmn2r58	GTTAATCCCTACAAATACCCAGAGGACAACTATCTTCCTAAGTTTTGGCATTTGTTTTTCAAGTGCTCATTTTCTGAATTTAATTGTCAACTTTTGGAGAACTGCCAACCCAATGCTTCTTTGGATTTACTTCCAAGACACCATTTTGACCCAGCCATGAATGAAGAAGGCTACAATATTTACAATGCTGTGCGTGCTGTTGCCTATAGTATCCATGAGATGAATCTTCAAAAAATACAGACCCAACCATATGCCAAAGGTGAAGAAATGGTATTCTTCCAGTGGCAGCTTCACCCTTTCCTAAAGAACACGATAATGAGAAGTCATATAGGAAGACACACAGCAACGCATGGGGGAGGAAACTTAGATGCACAGTACGACATTCTTAATTTTTGGAAT…
A8-4	Vmn2r62	GTGAATCCCTACACATACCCTGAAGATGATTATCTTCCTAAGTTTTGGGTTTTTTTCTTCAAGTGCTCTTTTTCTGAGTTTGATTGCCAACTTTTGGAGAACTGCCAACCCAATGCATCTTTGGACTTACTGCCCAGACACATTTTTGACCCAGCCATGAGTGAAGAGAGCTACAACCTATACAATGCTGTGTATGCTCTTGCTCACAGCCTCCATGAGATGACTGTTCAACAAATACAGACACAACCATATGCCAATGGAGACGGAATGGCATTCTTGCCCTGGCAGATCCTCCCTTTTCTAAAGATCACCCTACTTAAAAACCATCCAAGTGGTCAAACTGTAATTGATGAGAGGAAAAACTTATATTCAGAATATGACATTTTCAATTTTTGGAAT…
A9	Vmn2r81	ATGCTAGAAGCCACCCCCATCAAGTACCCAGAAGATATTTTTCTTCATTTATTGTGGTACTGGCATTTCAACTGCTCATTTTTGCATTCTGAATGTAAAATATTTGAAAACTGTCTGCAGAATGCCTCTTTGGAATTGTTGCCAGGAAATATTTTTACAATGACCATGACTGAAGAGAGTTACAATGTGTATAATGCTGTGTATGCAGTGGCCCACAGTCTGCATGAGGAGACACTCAGTCAAATACAATTTCAACCACAGGCAAATATTGATAGGACTCTGTTATTCCCCTGGCAGCTTCACCCTTTTCTGAAGAAGATTCAAGTGAAAAATTCTGTTGGGGACCACGTGGTTCTGGACTGGAAAAGGAAGGCAGATCCAGAGTATGATATTACCAAC…
A10	Vmn2r18	TCCAAGAAGAGAAATATCCCTGGTTTCAAGAACTTTCTCGAATCACTCACACCCTCCTACTACCCAGGAGAATTTTACTTCTATAAATTCTGGATTGACAAGTTTGATTGCGCACCTCCTGCTTTGCTATGTGGAAGGAATAAACCCTGTCCACTAAATATTACTCTGAAGAATAAAGAAGGAGAAAATGATATAATGATCCCTTCTGAGGCCAGCTATTCCATATGGAATACAGTGTATGCAGTGGCCCATGCCATTCATAATATGTTTTTGAGAAAAACAGAAATAGGATCTCATGAAGACAAAAATCATGACAGGTTTCTTCCTTGGCAGCTGCATCCATTTCTGAGGAAAATCCAATTTACCAACACTGCTGGGGACCCAATAAGTTTTGATGAG…
B	Vmn2r24	TTTCTCAGAAGTGTTCAACCTAGAAAATACCCTCATGATATCTTTATCCAGGATGTGTGGTCCATCTTATTTGAATGCCCATATTTTGATAAGGATGGAGTCAGGGAACTAAGTCAATGTGAGCCAAATGGCAGCCTAAGCACACGACCTCTGCATGCTTGGGATATGAATACCTCACCCTCAAGCTACAAAGTTCATGCTGCTGTGTATGCCATTGCCCAGGCACTCCATGAGGAGCTGTCACTCAGAGTGGAAGGAGACTCACTTGATAAAAGTGTACTCCGGCCTCCTTTGCCATGGAAGCTCCATCCATTCTTACAAAACAGCCAACTTGGGAGAAGCTCCAATGAGAAGAACGTTGTGAACAAGGAAGTTTCAGCAACCAAGCTTGACATCTTT…
D	Vmn2r53	CGCCCCAGCCAGACCCCAGAAGACATGTTTATAAAGAAGTTCTGGGAGTTCACCTTTGATTGTACATGGCCCTACCAAAACAGCACAGTGACAGAGGGTGTCCAGTTCTGCACAGGAAATGAGAGTCTGAAAAACAAGCCACATCCCTTTCCAGAAGTGAGTAGAATTGATGCTGCTTACACAGCTGTCTACAGCATTGCCCATGCTCTGCACAATATGCTAGCCTGTGAGCACCAGGAGAGGAAAGGTACAAACTCTCACAACTTCCATTCCTGGCAGCTGCTTCATAACCTCAGAAATGTGTACTTCAAGACTTCTGATGGAAATAAGATTATGTTTGATGCCAATGGAGATTTGGTGACACAATTTGACATTTTCCAAGGGAAGAAGACTCCTGCA…
